# Supplementary material for: Evaluation of Reinforcement Learning in Transformer-based Molecular Design
Source: Research Square preprint supplement (doi:10.21203/rs.3.rs-4106688/v1), 2024-03-20
Supplement: Supplementary file 1 [file 0da5cae0c551166e58f09421.pdf]

# Evaluation of Reinforcement Learning in Transformer-based Molecular Design

Jiazhen He<sup>1\*</sup>, Tibo Alessandro<sup>1</sup>, Jon Paul Janet<sup>1</sup>, Eva Nittinger<sup>2</sup>, Christian Tyrchan<sup>2</sup>, Werngard Czechtizkyr<sup>2</sup>, Ola Engkvist<sup>1,3</sup>

<sup>1</sup>Molecular AI, Discovery Sciences, R&D, AstraZeneca, Gothenburg, Sweden

<sup>2</sup>Medicinal Chemistry, Research and Early Development, Respiratory and Immunology (R&I), BioPharmaceuticals R&D, AstraZeneca, Gothenburg, Sweden

<sup>3</sup>Department of Computer Science and Engineering, Chalmers University of Technology, Gothenburg, Sweden

\*Correspondence: jiazhen.he@astrazeneca.com

## Supplementary material

### Effect of learning rate

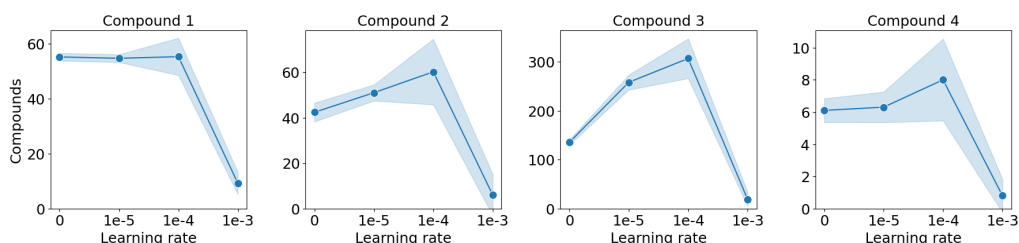

Figure S1: Molecular optimization task: effect of learning rates on the number of unique compounds with improved P(active) and QED, and Tanimoto similarity >0.7 when using RL\_DF(cmp).Sim. Results are mean values and  $\pm 1$  standard deviation over 10 runs.

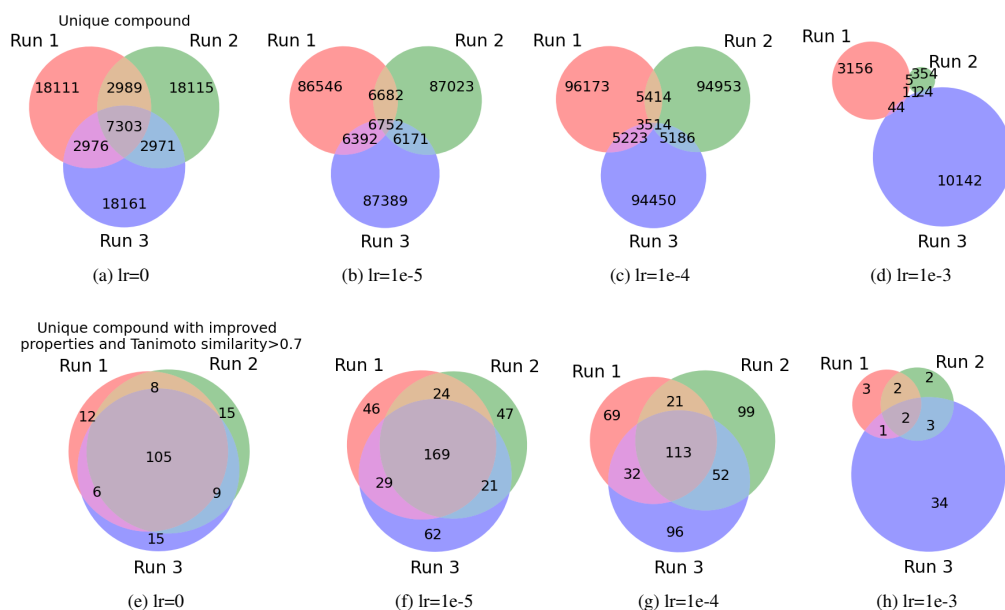

Figure S2: Molecular optimization task: overlap of three runs with varying learning rates (lr) on the unique compounds (a-d) and the unique compounds with improved P(active) and QED, and Tanimoto similarity above 0.7 compared to corresponding input molecule (e-h) produced by RL\_DF(cmp).Sim for compound 3.
